# Supplementary material
Source: publisher figshare collection journal article supplement (https://f1000.figshare.com/articles/dataset/_/106724)
Supplement: Supplementary file 4 [file 1]

|   | Group A | Group B | Group C | Group D | Group E | Group F | Group G | Group H | Group I |
|---|---------|---------|---------|---------|---------|---------|---------|---------|---------|
|   |         |         |         |         |         |         |         |         |         |
|   | Y       | Y       | Y       | Y       | Y       | Y       | Y       | Y       | Y       |
| 1 | 2003    | 503139  | 2900    | 2190    | 3736    | 4502    | 8494    | 2315    | 4614    |
| 2 | 4023    | 710038  | 3098    | 3495    | 4406    | 2962    | 1953    | 3243    | 3524    |
| 3 | 1940    | 492289  | 2819    | 2124    | 3637    | 4386    | 4378    | 2246    | 4496    |
| 4 | 3917    | 694734  | 3012    | 3401    | 4292    | 2879    | 1892    | 3154    | 3429    |
| 5 | 4178    | 734903  | 3221    | 3632    | 4575    | 3080    | 2036    | 3371    | 3662    |
| 6 | 2023    | 509533  | 2932    | 2212    | 3778    | 4554    | 4546    | 2339    | 4667    |
| 7 | 4639    | 801150  | 3595    | 4043    | 5071    | 3442    | 1303    | 3758    | 4076    |
| 8 | 4939    | 847466  | 3836    | 4309    | 5396    | 3673    | 2469    | 4008    | 4344    |

|   | Group J | Group K    | Group L    | Group M    |
|---|---------|------------|------------|------------|
|   |         | Data Set-K | Data Set-L | Data Set-M |
|   | Y       | Y          | Y          | Y          |
| 1 | 2990    |            |            |            |
| 2 | 2303    |            |            |            |
| 3 | 2906    |            |            |            |
| 4 | 2234    |            |            |            |
| 5 | 2398    |            |            |            |
| 6 | 3022    |            |            |            |
| 7 | 2698    |            |            |            |
| 8 | 2886    |            |            |            |
