# Supplementary material
Source: publisher figshare collection journal article supplement (https://f1000.figshare.com/articles/dataset/_/106724)
Supplement: Supplementary file 5 [file 1]

|   | Group A | Group B | Group C | Group D | Group E | Group F | Group G | Group H | Group I |
|---|---------|---------|---------|---------|---------|---------|---------|---------|---------|
|   |         |         |         |         |         |         |         |         |         |
|   | Y       | Y       | Y       | Y       | Y       | Y       | Y       | Y       | Y       |
| 1 | 2543    | 873139  | 2800    | 4722    | 3882    | 4011    | 2427    | 4315    | 4614    |
| 2 | 3526    | 682448  | 4082    | 3405    | 3455    | 2902    | 3253    | 3243    | 3009    |
| 3 | 2469    | 756476  | 2721    | 4601    | 3780    | 3905    | 2355    | 4203    | 4496    |
| 4 | 3431    | 667738  | 3975    | 3312    | 3361    | 2820    | 3164    | 3154    | 2925    |
| 5 | 3664    | 606348  | 4239    | 3539    | 3590    | 3018    | 3381    | 3371    | 3129    |
| 6 | 2569    | 782967  | 2830    | 4777    | 3926    | 4056    | 2452    | 4364    | 4667    |
| 7 | 4078    | 670024  | 4705    | 3941    | 3998    | 3374    | 3770    | 3758    | 3495    |
| 8 | 4346    | 814541  | 5010    | 4202    | 4262    | 3602    | 4021    | 4008    | 3729    |

|   | Group J | Group K    | Group L    | Group M    |
|---|---------|------------|------------|------------|
|   |         | Data Set-K | Data Set-L | Data Set-M |
|   | Y       | Y          | Y          | Y          |
| 1 | 2000    |            |            |            |
| 2 | 4903    |            |            |            |
| 3 | 1938    |            |            |            |
| 4 | 4778    |            |            |            |
| 5 | 5089    |            |            |            |
| 6 | 2020    |            |            |            |
| 7 | 5631    |            |            |            |
| 8 | 5989    |            |            |            |
