# Supplementary material
Source: publisher figshare collection journal article supplement (https://f1000.figshare.com/articles/dataset/_/106724)
Supplement: Supplementary file 6 [file 1]

|   | Group A | Group B | Group C | Group D | Group E | Group F | Group G | Group H | Group I |
|---|---------|---------|---------|---------|---------|---------|---------|---------|---------|
|   |         |         |         |         |         |         |         |         |         |
|   | Y       | Y       | Y       | Y       | Y       | Y       | Y       | Y       | Y       |
| 1 | 3925    | 498448  | 2082    | 3097    | 2706    | 3363    | 3753    | 2243    | 3034    |
| 2 | 2043    | 679139  | 2890    | 1922    | 3789    | 2552    | 3010    | 2789    | 2614    |
| 3 | 3821    | 487699  | 2018    | 3011    | 2629    | 3271    | 3653    | 2175    | 2949    |
| 4 | 1979    | 664500  | 2809    | 1861    | 3689    | 2478    | 2926    | 2710    | 2539    |
| 5 | 2128    | 702923  | 3006    | 2004    | 3936    | 2656    | 3130    | 2901    | 2720    |
| 6 | 3969    | 504782  | 2103    | 3131    | 2735    | 3400    | 3795    | 2266    | 3067    |
| 7 | 2404    | 766290  | 3361    | 2268    | 4375    | 2979    | 3496    | 3246    | 3049    |
| 8 | 2576    | 810592  | 3588    | 2432    | 4661    | 3184    | 3730    | 3467    | 3258    |

|   | Group J | Group K    | Group L    | Group M    |
|---|---------|------------|------------|------------|
|   |         | Data Set-K | Data Set-L | Data Set-M |
|   | Y       | Y          | Y          | Y          |
| 1 | 2703    |            |            |            |
| 2 | 3690    |            |            |            |
| 3 | 2625    |            |            |            |
| 4 | 3591    |            |            |            |
| 5 | 3834    |            |            |            |
| 6 | 2732    |            |            |            |
| 7 | 4263    |            |            |            |
| 8 | 4542    |            |            |            |
