# Supplementary material
Source: publisher figshare collection journal article supplement (https://f1000.figshare.com/articles/dataset/_/106724)
Supplement: Supplementary file 7 [file 1]

|   | Group A | Group B | Group C | Group D | Group E | Group F | Group G | Group H | Group I |
|---|---------|---------|---------|---------|---------|---------|---------|---------|---------|
|   |         |         |         |         |         |         |         |         |         |
|   | Y       | Y       | Y       | Y       | Y       | Y       | Y       | Y       | Y       |
| 1 | 2003    | 593139  | 2990    | 3190    | 2936    | 4932    | 3494    | 3115    | 504     |
| 2 | 2893    | 709084  | 1998    | 3445    | 3786    | 2212    | 2239    | 3243    | 3024    |
| 3 | 1940    | 580351  | 2907    | 3102    | 2854    | 4807    | 3399    | 3029    | 474     |
| 4 | 2812    | 693800  | 1936    | 3352    | 3685    | 2145    | 2172    | 3154    | 2940    |
| 5 | 3009    | 733916  | 2082    | 3580    | 3933    | 2304    | 2332    | 3371    | 3144    |
| 6 | 2023    | 600678  | 3023    | 3225    | 2968    | 4989    | 3533    | 3149    | 505     |
| 7 | 3364    | 800074  | 2354    | 3986    | 4371    | 2596    | 2626    | 3758    | 3511    |
| 8 | 3591    | 846327  | 2523    | 4250    | 4657    | 2778    | 2811    | 4008    | 3747    |

|   | Group J | Group K    | Group L    | Group M    |
|---|---------|------------|------------|------------|
|   |         | Data Set-K | Data Set-L | Data Set-M |
|   | Y       | Y          | Y          | Y          |
| 1 | 4990    |            |            |            |
| 2 | 2303    |            |            |            |
| 3 | 4863    |            |            |            |
| 4 | 2234    |            |            |            |
| 5 | 2398    |            |            |            |
| 6 | 5048    |            |            |            |
| 7 | 2698    |            |            |            |
| 8 | 2886    |            |            |            |
